# Supplementary material
Source: PubMed Central journal article supplement (PMC11088367)
Supplement: NIHMS835483-supplement-2.pdf [file NIHMS835483-supplement-2.pdf]

## Supplemental Inventory

Supplemental Figure 1: Refers to purification of sS1 myosin as mentioned in the Methods section

Supplemental Table 1: Summary of HCM mutations previously reported in literature

Supplemental Table 2: Summary of biomechanical data for WT, H251N and D239N sS1 myosins from this manuscript

Supplemental Methods: Detailed methods

Supplemental Movies 1-3: In vitro motility movies of WT, H251N, and D239N sS1 myosins as described in the Results section
